# Supplementary material
Source: PubMed Central journal article supplement (PMC4743648)
Supplement: NIHMS725634-supplement-Figures.pdf [file NIHMS725634-supplement-Figures.pdf]

## Supplementary Figures

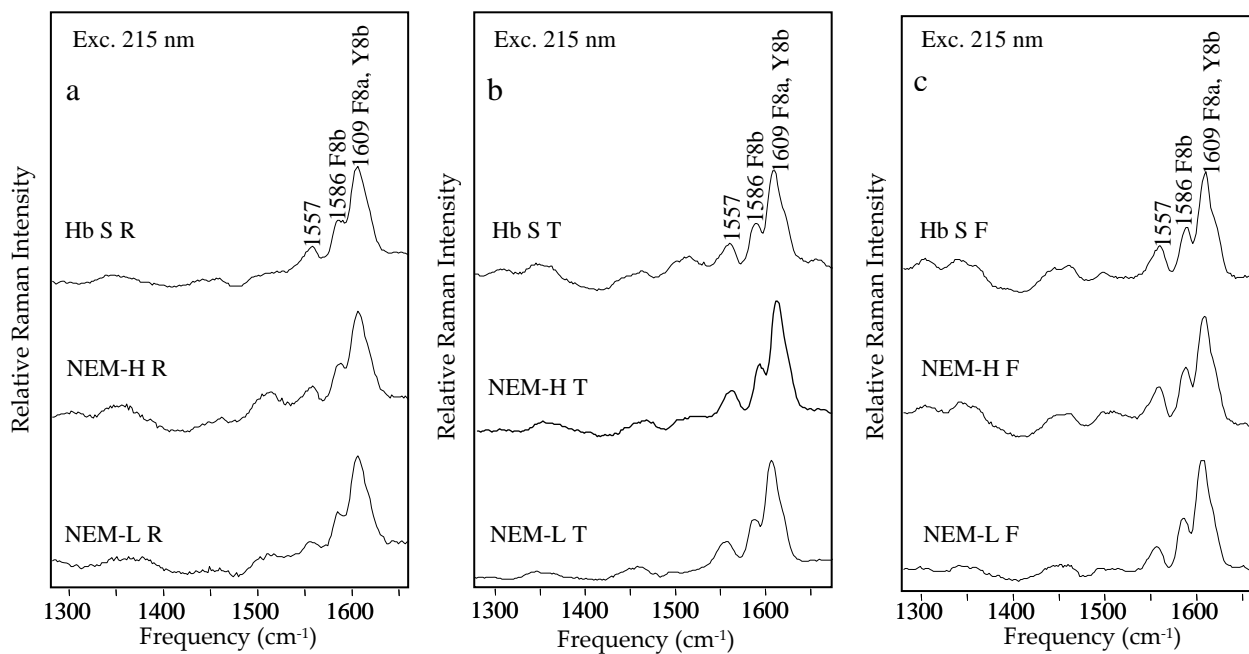

Supplementary Figure 1

Supplementary Figure 1: 215 nm-excited UVRR spectra. R- (a), T- (b), and Fiber-state (c), spectra of Hb S (top), NEM-H Hb (center) and NEM-L Hb (bottom) obtained with 215 nm excitation. Samples were prepared as described in figures 5 and 6. Depicted spectra result from 3 hours of data acquisition.

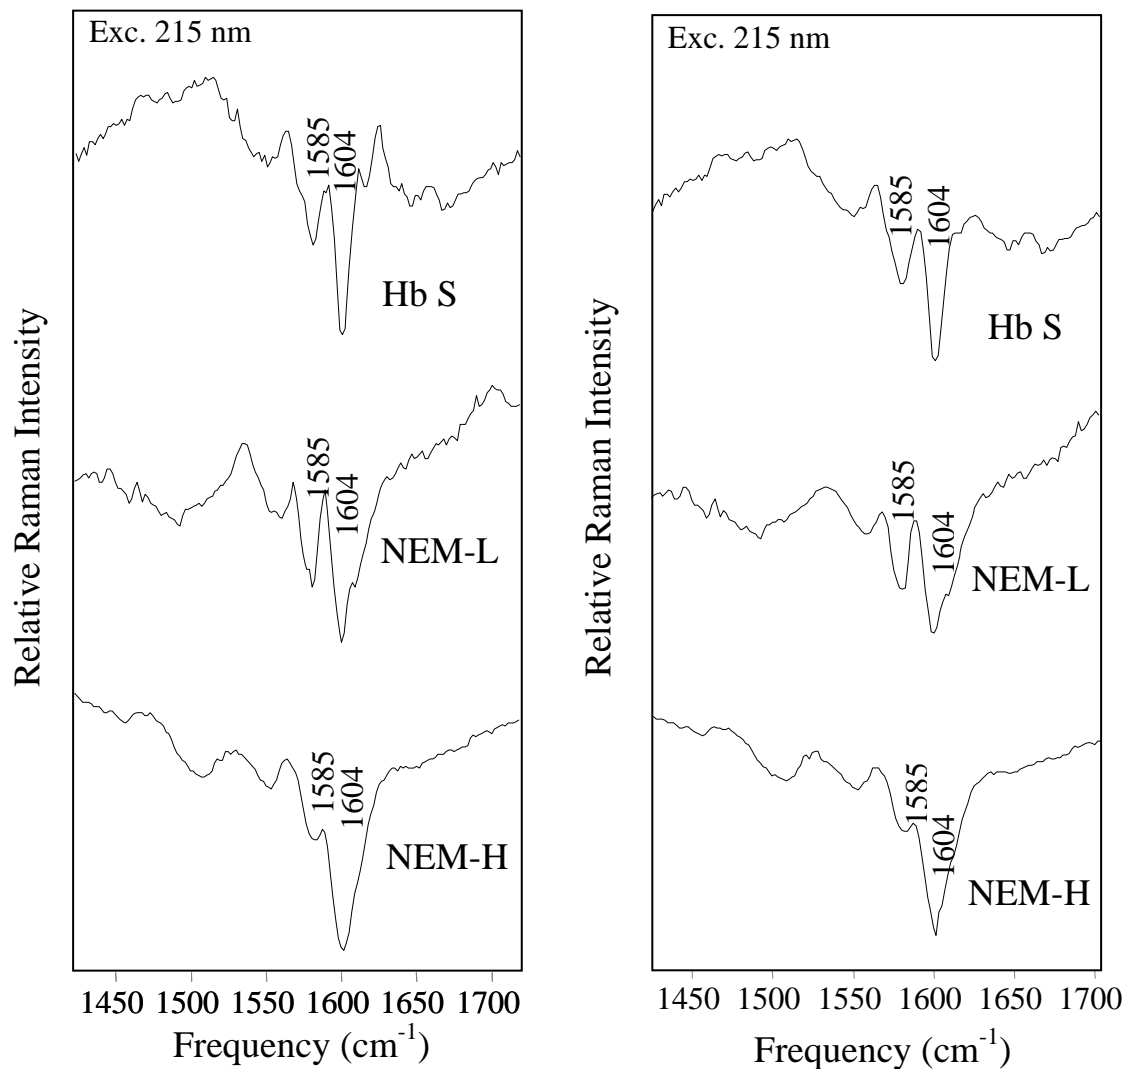

Supplementary Figure 2.

Supplementary Figure 2: T-R difference spectra of Hb S (top), NEM-H Hb (center) and NEM-L Hb (bottom), obtained with 215 nm excitation, in high (left) and low (right) potassium phosphate buffer.. Low phosphate samples were 0.25 mM Hb, in a 0.1 potassium phosphate buffer, pH 7.1, and high phosphate samples were 1.0 mM Hb in a 1.0 mM potassium phosphate buffer, pH 7.1. Samples were prepared as described in Materials and Methods.

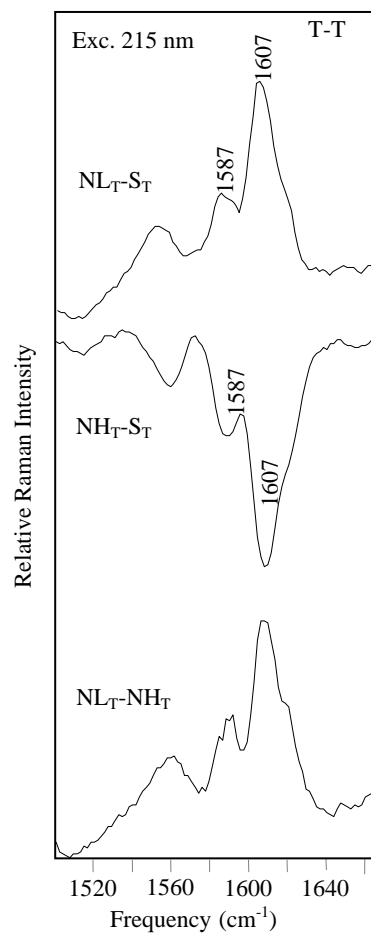

Supplementary Figure 3

Supplementary Figure 3: T-T difference spectra of Hb S (top), NEM-H Hb (center) and NEM-L Hb (bottom), obtained with 215 nm excitation. Samples were 0.25 mM Hb, in a 0.1 potassium phosphate buffer, pH 7.1. Samples were prepared as described in Materials and Methods.

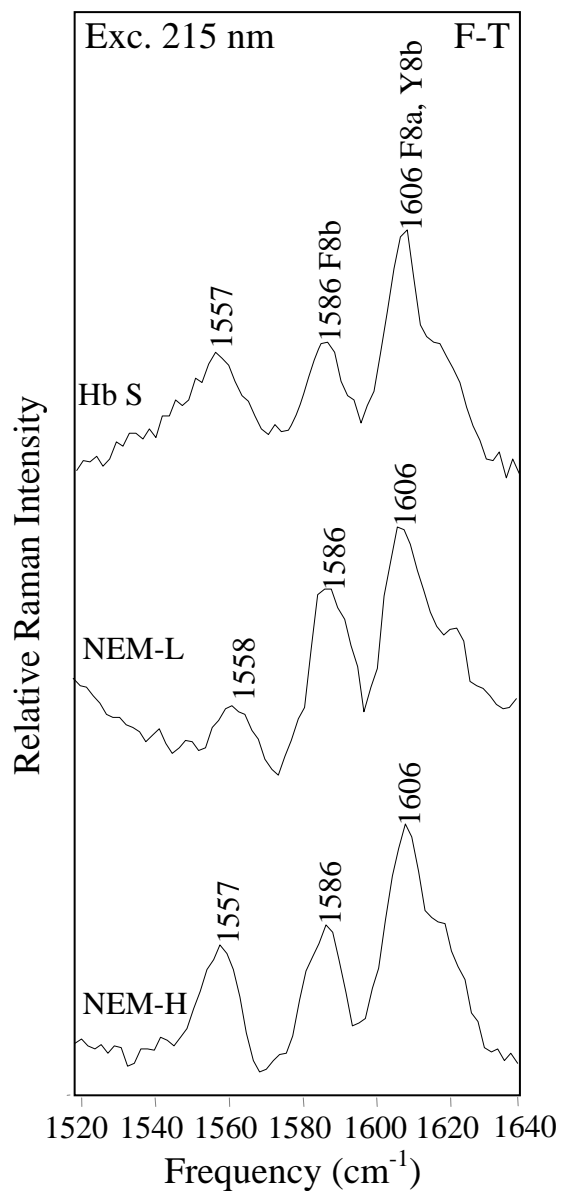

Supplementary Figure 4

Supplementary Figure 4: F-T difference spectra of Hb S (top), NEM-H Hb (center) and NEM-L Hb (bottom), obtained with 215 nm excitation. T-state samples were 0.25 mM Hb, in a 0.1 potassium phosphate buffer, pH 7.1, and fiber samples were 3.0 mM Hb in a 0.1 M potassium phosphate buffer, pH 7.1. Samples were prepared as described in Materials and Methods.

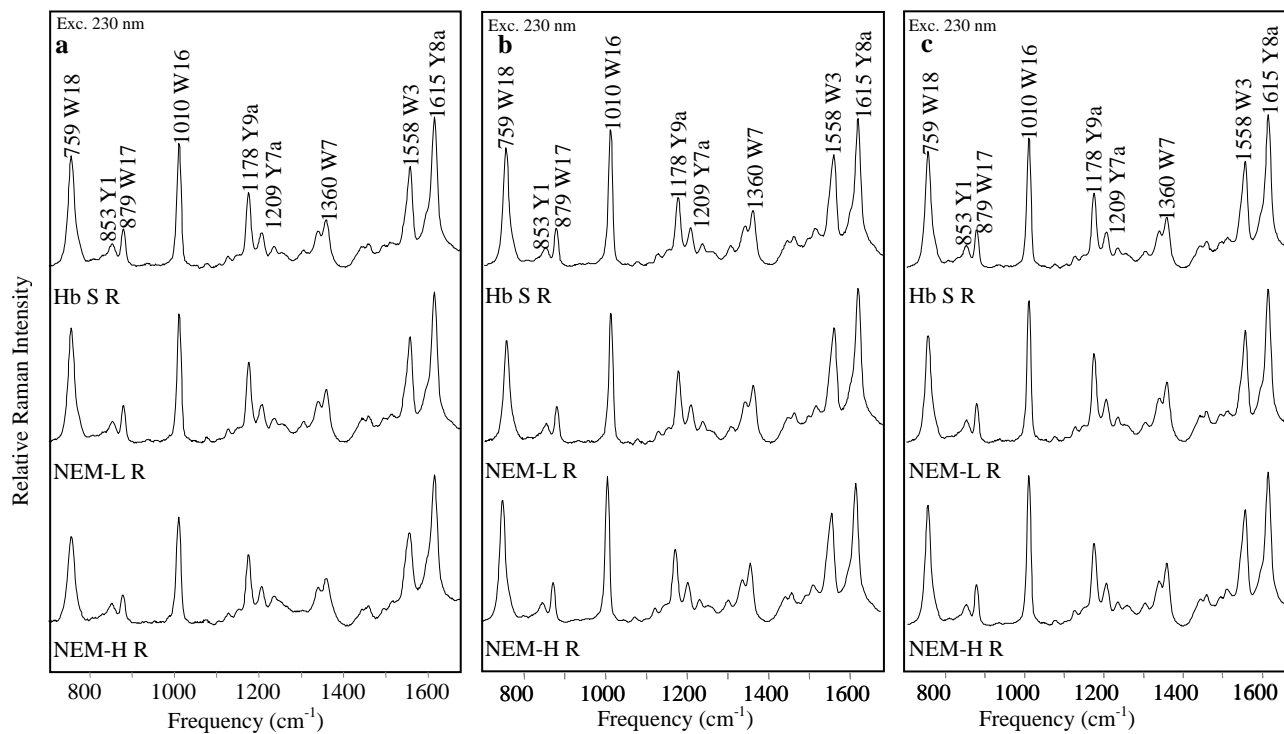

Supplementary Figure 5

Supplementary Figure 5: 230 nm excited UVRR spectra. R- (a), T- (b), and Fiber-state (c) spectra of Hb S (top), NEM-H Hb (center) and NEM-L Hb (bottom) obtained with 230 nm excitation. Samples were prepared as described in figures 5 and 6. Depicted spectra result from 3 hours of data acquisition.

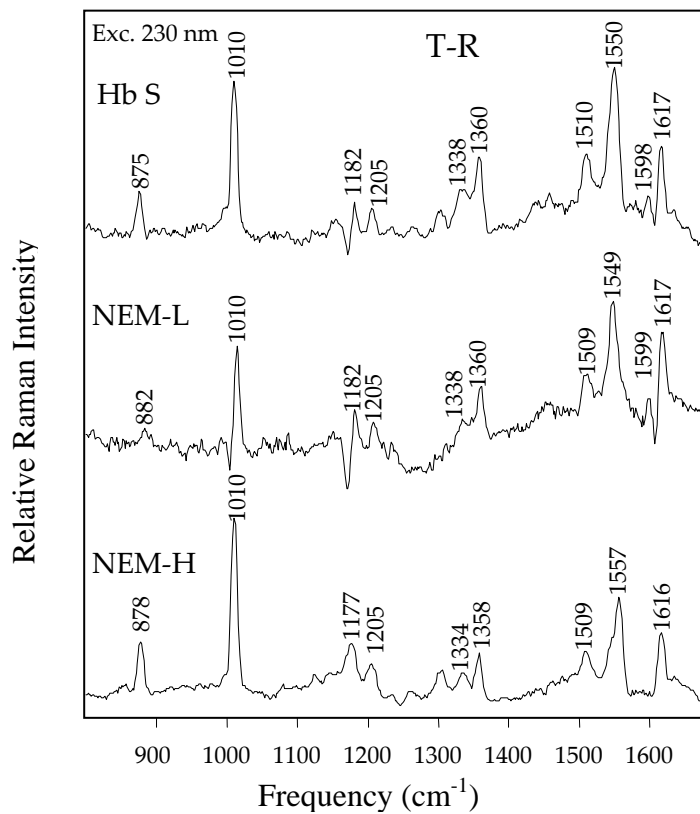

Supplementary Figure 6

Supplementary Figure 6: T-R difference spectra of Hb S (top), NEM-L (center) and NEM-H (bottom) obtained with 230 nm excitation. Samples were 0.25 mM Hb in a 0.1 M potassium phosphate buffer, pH 7.1.

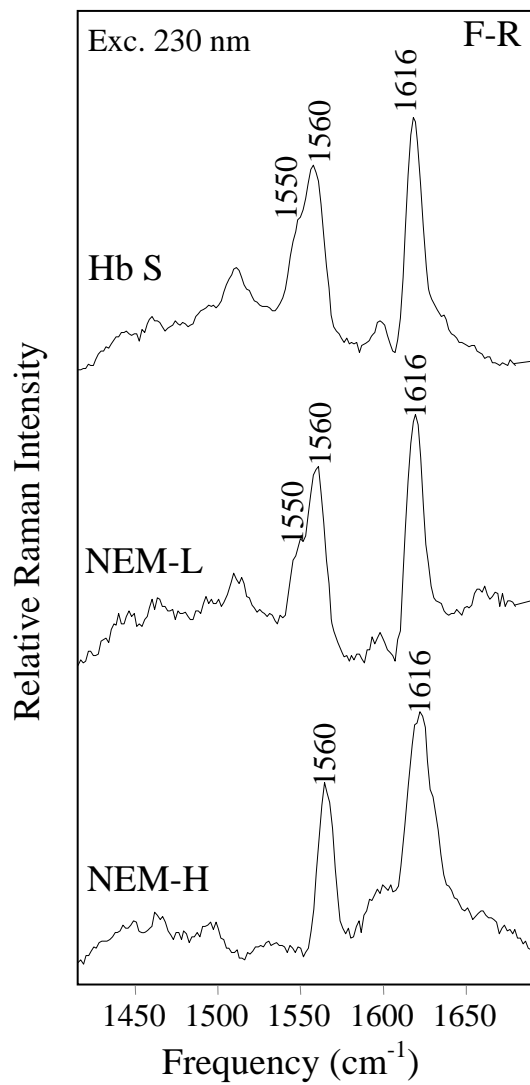

Supplementary Figure 7

Supplementary Figure 7: F-R difference spectra of Hb S (top), NEM-L (center) and NEM-H (bottom) obtained with 230 nm excitation. R-state samples were 0.25 mM Hb in a 0.1 M potassium phosphate buffer, pH 7.1, and fiber samples were 3.0 mM Hb in a 0.1 M potassium phosphate buffer, pH 7.1.

Supplementary Table 1

Supplementary Table 1: List of sequence of all Cys containing labeled peptides associated with the  $\beta$ 93 and  $\alpha$ 104 Cys residues, observed by reverse phase LC mass spectrometry.

$\alpha$ 104

VNFKLLSHCLLV  
VNFKLLSHCLLVT  
VNFKLLSHCLLVTLA  
VNFKLLSHCLLVTLAA  
VNFKLLSHCLLVTLAAHLPAAE  
AHKLRVDPVNFKLLSHCLL  
FKLLSHCLL  
FKLLSHCLLV  
FKLLSHCLLVTLA  
FKLLSHCLLVTLAA  
FKLLSHCLLVTLAAH  
FKLLSHCLLVTLAAHLPAAEFT  
FKLLSHCLLVTLAAHLPAAEFTPAV  
KLLSHCLL  
KLLSHCLLVTLA  
KLLSHCLLVTLAA  
KLLSHCLLVTLAAH  
KLLSHCLLVTLAAHLPAAEFT  
KLLSHCLLVTL  
KLRVDPVNFKLLSHCLL  
KLRVDPVNFKLLSHCLLV  
KLRVDPVNFKLLSHCLLVTL  
KLRVDPVNFKLLSHCLLVTLA  
LHAHKLRVDPVNFKLLSHCLL  
LLSHCLL  
LLSHCLLV  
LLSHCLLVTL  
LLSHCLLVTLA  
LLSHCLLVTLAAH  
LLSHCLLVTLAAHLPAAE  
LLSHCLLVTLAAHLPAAEFT  
LLSHCLLVTLAAHLPAAEFTPAV  
LRVDPVNFKLLSHCLL  
LRVDPVNFKLLSHCLLV  
LRVDPVNFKLLSHCLLVTL  
LSHCLLVTLAAH  
RVDPVNFKLLSHCLLV  
RVDPVNFKLLSHCLLVTL



RVDPVNFKLLSHCLLVTLA  
RVDPVNFKLLSHCLLVTLAAHLP  
AE  
RVDPVNFKLLSHCLL  
RVDPVNFKLLSHCLLV  
RVDPVNFKLLSHCLLVT  
RVDPVNFKLLSHCLLVTLAA  
RVDPVNFKLLSHCLLVTLAAH  
VDPVNFKLLSHCLL  
VDPVNFKLLSHCLLV  
VDPVNFKLLSHCLLVT  
VDPVNFKLLSHCLLVTLA  
VDPVNFKLLSHCLLVTLAA  
VNFKLLSHCLLV  
VNFKLLSHCLLVT  
VNFKLLSHCLLVTLA  
VNFKLLSHCLLVTLAA  
VNFKLLSHCLLVTLAAHLP  
AE

β93

AFSDGLAHLDNLKGTFATLSELHCDKL  
AHLDNLKGTFATLSELHCDKLH  
AHLDNLKGTFATLSELHCDKLHVDPENFRL  
AHLDNLKGTFATLSELHCDKLHVDPENFRLL  
ATLSELHCDKLH  
ATLSELHCDKLHVD  
ATLSELHCDKLHVDPENFRLL  
ATLSELHCDKLHVDPENFRLLGNVL  
ATLSELHCDKL  
ATLSELHCDKLHVDPENFR  
ATLSELHCDKLHVDPENFRLLGNVLV  
ATLSELHCDKLHVDPENFRLLGNVLVCVL  
FATLSELHCDKL  
FATLSELHCDKLH  
FATLSELHCDKLHVD  
FATLSELHCDKLHVDPENFR  
FATLSELHCDKLHVDPENFRL  
FATLSELHCDKLHVDPENFRLLG  
KGT  
FATLSELHCDKL  
KGT  
FATLSELHCDKLH  
KGT  
FATLSELHCDKLHVD  
KGT  
FATLSELHCDKLHVDPENFRL  
KGT  
FATLSELHCDKLHVDPENFRLLGNVLV  
LDNLKGTFATLSELHCDKLHVDPENFR  
LDNLKGTFATLSELHCDKL  
LGA  
FSDGLAHLDNLKGTFATLSELHCDKL  
LHCDKLH

LHCDKLHVD  
LHCDKLHVDPENFRL  
LHCDKLHVDPENFRLL  
LHCDKLHVDPENFRLLG  
LHCDKLHVDPENFRLLGNVLV  
LHCDKLHVDPENFRLLGNVLVCVL  
LHCDKLHVDPENFR  
LKGTFATLSELHCDKL  
LKGTFATLSELHCDKLH  
LKGTFATLSELHCDKLHVD  
LKGTFATLSELHCDKLHVDPENFRLL  
LSELHCDKLHVD  
LSELHCDKLHVDPENFRL  
LSELHCDKL  
LSELHCDKLHVDPENFR  
LSELHCDKLHVDPENFRLLG  
LSELHCDKLHVDPENFRLLGNVL  
LSELHCDKLHVDPENFRLLGNVLVCVL  
LSELHCDKLHVDPENFRLLGNVLVCVLA
